# Supplementary material for: Physical and hydrodynamic properties of deep sea mining-generated, abyssal sediment plumes in the Clarion Clipperton Fracture Zone (eastern-central Pacific)
Source: Oxford University Press journal article supplement (doi:10.1525/elementa.343), 2019-01-01
Supplement: elementa-7-343-s1.pdf [file elementa-7-343-s1.pdf]

# Supplemental Text S1

Physical and hydrodynamic properties of deep sea mining-generated, abyssal sediment plume in the Clarion Clipperton Fracture Zone (eastern-central Pacific)

Benjamin Gillard<sup>1,2,\*</sup>, Kaveh Purkiani<sup>1</sup>, Damianos Chatzievangelou<sup>2</sup>, Annemiek Vink<sup>3</sup>, Morten H. Iversen<sup>1</sup>, Laurenz Thomsen<sup>2</sup>

<sup>1</sup> MARUM - Center for Marine Environmental Sciences, University of Bremen, Bremen, Germany; <sup>2</sup> Jacobs University, Bremen, Germany; <sup>3</sup> BGR, Bundesanstalt für Geowissenschaften und Rohstoffe, Hannover, Germany

\* [b.gillard@jacobs-university.de](mailto:b.gillard@jacobs-university.de) / [bgillard@marum.de](mailto:bgillard@marum.de)

## List of Contents:

**Text S1. Supplemental materials and methods**

## 26 **Text S1. Supplemental materials and methods**

27

### 28 *Samples preparation and experimental conditions*

29 An aliquot of approximately 0.5 g from every sediment core layer (i.e., 1 cm) was weighed on a  
30 fine-scale balance and dried at 105 °C to constant mass in an oven. The difference in mass before  
31 and after the drying procedure was used to determine the initial water content. Based on the wet /  
32 dry weight ( $d_w$ ) calculation, a sediment stock solution with a final concentration of 5 g L<sup>-1</sup> ( $d_w$ )  
33 was prepared. The suspension was stirred (1250 rpm) multiple times for 30 min. Total  
34 disaggregation was confirmed when particle size distribution did not change over time using the  
35 LISST-100X.

### 36 *Instrumentation use for suspended particle size detection*

#### 37 **LISST-100 X**

38 A LISST-100 type C (**L**aser **I**n **S**itu **S**cattering and **T**ransmissometry; Sequoia Scientific) was  
39 used for the detection of smaller particle sizes (i.e., < 500 μm). The principle of laser diffraction,  
40 use and mathematical model for data analysis are detailed in Agrawal and Pottsmith (2000). The  
41 LISST-100X provides particle volume concentration (μL L<sup>-1</sup>) measured in 32 logarithmically  
42 spaced size bins ranging from 2.5 to 500 μm. A small volume flow through chamber (Sequoia  
43 Scientific) was mounted reducing the optical path length to 1 cm and extending the measurable  
44 suspended sediment limit concentration of the laser. The scattering pattern of the instrument was  
45 inverted using the random shape model (Agrawal et al., 2008).

46

#### 47 **Digital floc camera configuration**

48 Larger particle sizes (i.e., > 70 μm) and their concentrations were estimated by image analysis.  
49 Floc images were captured using a DFK 23UX174 (1920 x 1200 pixels at 54 fps; The Imaging  
50 Source) camera mounted with a TEC-M55MPW telecentric lens (Computar) and 15-mm  
51 extension tube. The resolution of the set up was calibrated with a 1-mm ruler (Thor labs A1L3S2)  
52 and the depth of field was estimated with a 45° depth of field target (Edmund Optic 54-440). The  
53 resulting field of view produced was 1.53 cm x 0.96 cm (8 μm/pixel) for a 2-mm depth of field.

54 The minimum number of pixels defining the smallest particle resolution may vary from 1 pixel up  
55 to a standard rule of 9 pixels (Mikkelsen et al., 2004; Maggi et al., 2007; Smith and Friedrichs,

56 2015). The minimum particle size used in this study was based on the ISO regulation (13322-  
57 1:2014) for image analysis with a particle made of at least 10 pixels.

58 Since a high shutter speed (min 1/1000 s) was required, a strong Light source was necessary for  
59 high image quality. Thus, a square open LED bar light (OPT-LIM11222, Opto Engineering) was  
60 used, ensuring optimum illumination conditions. The set-up allows a bright 360° illumination,  
61 used as back illumination with or without a white filter for all experiments.

62

### 63 **Sediment particle size distribution**

64 A suspended sediment concentration of approximately 60 mg L<sup>-1</sup> was prepared from the stock  
65 solution. This effective concentration allows the LISST-100X laser transmission to be ± 60 % and  
66 represent an appropriate number of particles to be visualized by the camera.

67 The camera was facing towards the measuring chamber, consisting of two coated glasses of 20 x  
68 18 cm which were separated by a 2-mm thick silicone grid, forming six isolated measuring  
69 columns. With this configuration, all the particles flowing through the measuring chamber were  
70 in the field of view of the camera. Images were captured vertically, starting from the lower part of  
71 the column to ensure that bigger particles were measured.

72 Volume concentrations detected between the two instruments in each of the overlapping size bins  
73 differed in orders of magnitude. Therefore, a correction formula was applied to the Digital Flocc  
74 Camera values, separately for each sample. The correction factors applied, corresponded to the  
75 slope and intercept of a linear regression between the Digital Flocculation Camera and the LISST  
76 (Table S3). For each sample, the maximum number of consecutive overlapping size bins giving a  
77 significant linear relationship was used for calculations, always excluding from the bigger size  
78 bins and downwards when necessary.

79

### 80 **Settling column description**

81 Made of a square 4-cm cross section and 50-cm high bore silica glass, the column can be  
82 mounted either on a LISST-100X or used separately for higher size aggregates (Figure S3). An  
83 outer 6-cm square cross-section column running with a cooling fluid (distilled water + 20 %  
84 ethanol) was maintained at fix temperature of 1.5 °C by a cooler system. This way, a drastic

85 reduction of temperature gradient in the column is provided, avoiding the formation of convection  
86 cells.

87 The settling column was first filled with the same water used during the aggregation experiments  
88 and was left standing for several hours. For minimizing evaporation at air-water interface, the  
89 column was closed with a lid (Johnson et al., 1996; Ploug et al., 2010).

90

## 91 References

92 Agrawal YC, Pottsmith HC. 2000. Instruments for particle size and settling velocity observations  
93 in sediment transport. *Mar Geol* **168**(1–4): 89–114. doi: 10.1016/S0025-3227(00)00044-X

94 Agrawal YC, Whitmire A, Mikkelsen OA, Pottsmith HC. 2008. Light scattering by random  
95 shaped particles and consequences on measuring suspended sediments by laser diffraction. *J*  
96 *Geophys Res Ocean* **113**(4): 1–11. doi: 10.1029/2007JC004403

97 Johnson CP, Li X, Logan BE. 1996. Settling velocities of fractal aggregates. *Environ Sci Technol*  
98 **30**(6): 1911–1918. doi: 10.1021/es950604g

99 Maggi F, Mietta F, Winterwerp JC. 2007. Effect of variable fractal dimension on the floc size  
100 distribution of suspended cohesive sediment. *J Hydrol* **343**(1–2): 43–55. doi:  
101 10.1016/j.jhydrol.2007.05.035

102 Mikkelsen OA, Milligan TG, Hill PS, Moffatt D. 2004. INSSECT-an instrumented platform for  
103 investigating floc properties close to the seabed. *Limnol Oceanogr Methods* **2**(7): 226–236.  
104 doi: 10.4319/lom.2004.2.226

105 Ploug H, Terbruggen A, Kaufmann A, Wolf-Gladrow D, Passow U. 2010. A novel method to  
106 measure particle sinking velocity in vitro, and its comparison to three other in vitro  
107 methods. *Limnol Oceanogr Methods* **8**: 386–393. doi: 10.4319/lom.2010.8.386

108 Smith SJ, Friedrichs CT. 2015. Image processing methods for in situ estimation of cohesive  
109 sediment floc size, settling velocity, and density. *Limnol Oceanogr Methods* **13**(5): 250–  
110 264. doi: 10.1002/lom3.10022

111
